# Supplementary material for: Unraveling Attributes of COVID-19 Vaccine Hesitancy and Uptake in the U.S.: A Large Nationwide Study
Source: bioRxiv or medRxiv preprint supplement (doi:10.1101/2021.04.05.21254918), 2021-07-02
Supplement: Supplementary file [file media-2.pdf]

**Supplementary Table 1: Demographics** – Descriptive statistics for the demographic characteristics of the HWF user base.

| <b>Variable</b>                      | <b>Level</b>                              | <b>Intent Respondents<br/>(n = 36,711)</b> | <b>Uptake Respondents<br/>(n=23,429)</b> |
|--------------------------------------|-------------------------------------------|--------------------------------------------|------------------------------------------|
| <b>Sex</b>                           | <b>Male</b>                               | 7,616 (21%)                                | 5,108 (22%)                              |
|                                      | <b>Female</b>                             | 29,095 (79%)                               | 18,321 (78%)                             |
| <b>Age</b>                           | <b>[18,30)</b>                            | 4,815 (13%)                                | 2,415 (10%)                              |
|                                      | <b>[30,45)</b>                            | 7,468 (20%)                                | 4,028 (17%)                              |
|                                      | <b>[45,55)</b>                            | 6,416 (17%)                                | 3,988 (17%)                              |
|                                      | <b>[55,65)</b>                            | 8,767 (24%)                                | 6,131 (26%)                              |
|                                      | <b>[65,100)</b>                           | 9,245 (25%)                                | 6,867 (29%)                              |
| <b>Profession</b>                    | <b>Nonessential</b>                       | 24,823 (68%)                               | 16,492 (70%)                             |
|                                      | <b>Healthcare</b>                         | 4,597 (13%)                                | 2,773 (12%)                              |
|                                      | <b>Other Essential</b>                    | 4,087 (11%)                                | 2,529 (11%)                              |
|                                      | <b>Missing</b>                            | 3,204 (9%)                                 | 1,635 (7%)                               |
| <b>Employment Status</b>             | <b>Employed</b>                           | 19,205 (52%)                               | 12,206 (52%)                             |
|                                      | <b>Furloughed/Job Seeker</b>              | 2,344 (6%)                                 | 1,466 (6%)                               |
|                                      | <b>Unemployed</b>                         | 10,264 (28%)                               | 7,581 (32%)                              |
|                                      | <b>Missing</b>                            | 4,898 (13%)                                | 2,176 (9%)                               |
| <b>Race/Ethnicity</b>                | <b>White</b>                              | 30,128 (83%)                               | 19,526 (83%)                             |
|                                      | <b>Black/African American</b>             | 1,461 (4%)                                 | 932 (4%)                                 |
|                                      | <b>Hispanic/Latinx</b>                    | 1,968 (5%)                                 | 1,103 (5%)                               |
|                                      | <b>Asian</b>                              | 904 (2%)                                   | 512 (2%)                                 |
|                                      | <b>Multiracial/Other</b>                  | 2,250 (6%)                                 | 1,356 (6%)                               |
| <b>Median Household Income</b>       | <b>0-40k</b>                              | 1,458 (4%)                                 | 897 (4%)                                 |
|                                      | <b>40-70k</b>                             | 12,478 (34%)                               | 7,770 (33%)                              |
|                                      | <b>70-100k</b>                            | 13,151 (36%)                               | 8,536 (36%)                              |
|                                      | <b>100K+</b>                              | 9,624 (26%)                                | 6,226 (27%)                              |
| <b>Population Density</b>            | <b>0-149 people/sq. mi</b>                | 4,079 (11%)                                | 2,509 (11%)                              |
|                                      | <b>150-999 people/sq. mi</b>              | 13,516 (37%)                               | 8,497 (36%)                              |
|                                      | <b>1000+ people/sq. mi</b>                | 19,116 (52%)                               | 12,423 (53%)                             |
| <b>Preexisting Conditions</b>        | <b>0</b>                                  | 8,535 (23%)                                | 5,266 (22%)                              |
|                                      | <b>1</b>                                  | 12,564 (34%)                               | 7,905 (34%)                              |
|                                      | <b>2</b>                                  | 8,502 (23%)                                | 5,446 (23%)                              |
|                                      | <b>3+</b>                                 | 6,723 (18%)                                | 4,589 (20%)                              |
|                                      | <b>Not Say</b>                            | 387 (1%)                                   | 223 (1%)                                 |
| <b>Census Location</b>               | <b>Northeast</b>                          | 13,790 (38%)                               | 9,139 (39%)                              |
|                                      | <b>West</b>                               | 9,053 (25%)                                | 5,649 (24%)                              |
|                                      | <b>Midwest</b>                            | 5,627 (15%)                                | 3,561 (15%)                              |
|                                      | <b>South</b>                              | 8,241 (22%)                                | 5,080 (22%)                              |
| <b>Practiced Protective Measures</b> | <b>During Every Login</b>                 | 13,108 (36%)                               | 7,146 (31%)                              |
|                                      | <b>Not Every Login</b>                    | 23,603 (64%)                               | 16,283 (69%)                             |
| <b>Ever Received COVID Test</b>      | <b>Yes</b>                                | 5,075 (14%)                                | 3,262 (14%)                              |
|                                      | <b>No</b>                                 | 31,636 (86%)                               | 20,167 (86%)                             |
| <b>COVID Status</b>                  | <b>Never Tested Positive/Never Tested</b> | 36,536 (99%)                               | 107 (<1%)                                |
|                                      | <b>Tested Positive</b>                    | 175 (<1%)                                  | 23,322 (99%)                             |

**Supplementary Table 2: Hesitancy Rates –**  
 Unweighted and weighted percentages of the  
 vaccine intent responses across demographics.

| Variable                            | Level                  | Unweighted Percents |               |                 |              |                   | Weighted Percents  |               |                 |              |                   |
|-------------------------------------|------------------------|---------------------|---------------|-----------------|--------------|-------------------|--------------------|---------------|-----------------|--------------|-------------------|
|                                     |                        | Very Unlikely (4%)  | Unlikely (3%) | Undecided (10%) | Likely (13%) | Very Likely (70%) | Very Unlikely (4%) | Unlikely (3%) | Undecided (11%) | Likely (13%) | Very Likely (69%) |
| <b>Sex</b>                          |                        |                     |               |                 |              |                   |                    |               |                 |              |                   |
|                                     | Male                   | 188 (2%)            | 141 (2%)      | 487 (6%)        | 765 (10%)    | 6035 (79%)        | 3%                 | 2%            | 8%              | 11%          | 76%               |
|                                     | Female                 | 1140 (4%)           | 802 (3%)      | 3335 (11%)      | 3980 (14%)   | 19838 (68%)       | 5%                 | 3%            | 14%             | 14%          | 64%               |
| <b>Age</b>                          |                        |                     |               |                 |              |                   |                    |               |                 |              |                   |
|                                     | [18,30]                | 237 (5%)            | 152 (3%)      | 620 (13%)       | 747 (16%)    | 3059 (64%)        | 6%                 | 3%            | 14%             | 15%          | 62%               |
|                                     | [30,45]                | 352 (5%)            | 227 (3%)      | 947 (13%)       | 1028 (14%)   | 4914 (66%)        | 5%                 | 3%            | 13%             | 13%          | 65%               |
|                                     | [45,55]                | 296 (5%)            | 175 (3%)      | 821 (13%)       | 866 (13%)    | 4258 (66%)        | 5%                 | 3%            | 13%             | 13%          | 66%               |
|                                     | [55,65]                | 236 (3%)            | 196 (2%)      | 810 (9%)        | 1065 (12%)   | 6460 (74%)        | 3%                 | 2%            | 10%             | 12%          | 73%               |
|                                     | [65,100]               | 207 (2%)            | 193 (2%)      | 624 (7%)        | 1039 (11%)   | 7182 (78%)        | 3%                 | 2%            | 7%              | 11%          | 77%               |
| <b>Profession</b>                   |                        |                     |               |                 |              |                   |                    |               |                 |              |                   |
|                                     | Nonessential           | 793 (3%)            | 603 (2%)      | 2345 (9%)       | 3241 (13%)   | 17841 (72%)       | 4%                 | 3%            | 10%             | 13%          | 70%               |
|                                     | Healthcare             | 177 (4%)            | 130 (3%)      | 551 (12%)       | 548 (12%)    | 3191 (69%)        | 4%                 | 3%            | 13%             | 12%          | 68%               |
|                                     | Other Essential        | 217 (5%)            | 139 (3%)      | 581 (14%)       | 580 (14%)    | 2570 (63%)        | 6%                 | 4%            | 14%             | 14%          | 62%               |
|                                     | Missing                | 141 (4%)            | 71 (2%)       | 345 (11%)       | 376 (12%)    | 2271 (71%)        | 5%                 | 2%            | 12%             | 12%          | 69%               |
| <b>Self-Reported Race/Ethnicity</b> |                        |                     |               |                 |              |                   |                    |               |                 |              |                   |
|                                     | White                  | 904 (3%)            | 682 (2%)      | 2696 (9%)       | 3755 (12%)   | 22091 (73%)       | 3%                 | 2%            | 8%              | 12%          | 74%               |
|                                     | Black/African American | 155 (11%)           | 96 (7%)       | 358 (25%)       | 235 (16%)    | 617 (42%)         | 11%                | 7%            | 25%             | 16%          | 42%               |
|                                     | Hispanic/Latinx        | 120 (6%)            | 70 (4%)       | 346 (18%)       | 258 (13%)    | 1174 (60%)        | 6%                 | 3%            | 17%             | 13%          | 60%               |
|                                     | Asian                  | 18 (2%)             | 22 (2%)       | 119 (13%)       | 151 (17%)    | 594 (66%)         | 2%                 | 3%            | 14%             | 15%          | 66%               |
|                                     | Multiracial/Other      | 131 (6%)            | 73 (3%)       | 303 (13%)       | 346 (15%)    | 1397 (62%)        | 6%                 | 3%            | 13%             | 14%          | 65%               |
| <b>Median Household Income</b>      |                        |                     |               |                 |              |                   |                    |               |                 |              |                   |
|                                     | 0-40k                  | 85 (6%)             | 62 (4%)       | 234 (16%)       | 170 (12%)    | 907 (62%)         | 6%                 | 5%            | 17%             | 11%          | 61%               |
|                                     | 40-70k                 | 618 (5%)            | 393 (3%)      | 1605 (13%)      | 1645 (13%)   | 8217 (66%)        | 6%                 | 3%            | 14%             | 13%          | 65%               |
|                                     | 70-100k                | 402 (3%)            | 312 (2%)      | 1281 (10%)      | 1715 (13%)   | 9441 (72%)        | 4%                 | 2%            | 10%             | 13%          | 71%               |
|                                     | 100K+                  | 223 (2%)            | 176 (2%)      | 702 (7%)        | 1215 (13%)   | 7308 (76%)        | 3%                 | 2%            | 8%              | 13%          | 75%               |

|                                      |                              |           |          |            |            |             |    |    |     |     |     |
|--------------------------------------|------------------------------|-----------|----------|------------|------------|-------------|----|----|-----|-----|-----|
| <b>Population Density</b>            | <b>0-149 people/sq. mi</b>   | 199 (5%)  | 131 (3%) | 542 (13%)  | 575 (14%)  | 2632 (65%)  | 5% | 3% | 14% | 14% | 65% |
|                                      | <b>150-999 people/sq. mi</b> | 579 (4%)  | 379 (3%) | 1448 (11%) | 1726 (13%) | 9384 (69%)  | 5% | 3% | 11% | 12% | 68% |
|                                      | <b>1000+ people/sq. mi</b>   | 550 (3%)  | 433 (2%) | 1832 (10%) | 2444 (13%) | 13857 (72%) | 4% | 3% | 11% | 13% | 70% |
|                                      | <hr/>                        |           |          |            |            |             |    |    |     |     |     |
| <b>Preexisting Conditions</b>        | <b>0</b>                     | 295 (3%)  | 197 (2%) | 869 (10%)  | 1121 (13%) | 6053 (71%)  | 4% | 3% | 11% | 13% | 69% |
|                                      | <b>1</b>                     | 412 (3%)  | 343 (3%) | 1336 (11%) | 1618 (13%) | 8855 (70%)  | 4% | 3% | 12% | 13% | 68% |
|                                      | <b>2</b>                     | 302 (4%)  | 231 (3%) | 840 (10%)  | 1119 (13%) | 6010 (71%)  | 4% | 3% | 11% | 12% | 70% |
|                                      | <b>3+</b>                    | 293 (4%)  | 164 (2%) | 734 (11%)  | 838 (12%)  | 4694 (70%)  | 5% | 3% | 12% | 12% | 69% |
|                                      | <b>Not Say</b>               | 26 (7%)   | 8 (2%)   | 43 (11%)   | 49 (13%)   | 261 (67%)   | 9% | 2% | 14% | 14% | 61% |
|                                      | <hr/>                        |           |          |            |            |             |    |    |     |     |     |
| <b>Census Location</b>               | <b>Northeast</b>             | 345 (3%)  | 277 (2%) | 1255 (9%)  | 1780 (13%) | 10133 (73%) | 3% | 2% | 10% | 13% | 71% |
|                                      | <b>West</b>                  | 307 (3%)  | 240 (3%) | 902 (10%)  | 1174 (13%) | 6430 (71%)  | 3% | 3% | 10% | 13% | 71% |
|                                      | <b>Midwest</b>               | 216 (4%)  | 164 (3%) | 641 (11%)  | 715 (13%)  | 3891 (69%)  | 4% | 3% | 11% | 13% | 70% |
|                                      | <b>South</b>                 | 460 (6%)  | 262 (3%) | 1024 (12%) | 1076 (13%) | 5419 (66%)  | 6% | 3% | 13% | 13% | 65% |
| <hr/>                                |                              |           |          |            |            |             |    |    |     |     |     |
| <b>Employment Status</b>             | <b>Employed</b>              | 661 (3%)  | 512 (3%) | 2108 (11%) | 2619 (14%) | 13305 (69%) | 4% | 3% | 11% | 14% | 69% |
|                                      | <b>Furloughed/Job Seeker</b> | 102 (4%)  | 90 (4%)  | 303 (13%)  | 310 (13%)  | 1539 (66%)  | 5% | 4% | 16% | 12% | 63% |
|                                      | <b>Unemployed</b>            | 320 (3%)  | 227 (2%) | 808 (8%)   | 1287 (13%) | 7622 (74%)  | 4% | 2% | 9%  | 12% | 72% |
|                                      | <b>Missing</b>               | 245 (5%)  | 114 (2%) | 603 (12%)  | 529 (11%)  | 3407 (70%)  | 6% | 3% | 13% | 11% | 67% |
|                                      | <hr/>                        |           |          |            |            |             |    |    |     |     |     |
| <b>Practiced Protective Measures</b> | <b>During Every Login</b>    | 438 (3%)  | 287 (2%) | 1282 (10%) | 1475 (11%) | 9626 (73%)  | 4% | 2% | 11% | 11% | 72% |
|                                      | <b>Not Every Login</b>       | 890 (4%)  | 656 (3%) | 2540 (11%) | 3270 (14%) | 16247 (69%) | 4% | 3% | 12% | 14% | 67% |
|                                      | <hr/>                        |           |          |            |            |             |    |    |     |     |     |
| <b>Ever Received COVID Test</b>      | <b>Yes</b>                   | 145 (3%)  | 100 (2%) | 462 (9%)   | 569 (11%)  | 3799 (75%)  | 3% | 2% | 10% | 11% | 74% |
|                                      | <b>No</b>                    | 1183 (4%) | 843 (3%) | 3360 (11%) | 4176 (13%) | 22074 (70%) | 4% | 3% | 12% | 13% | 68% |

**Supplementary Table 3: Univariate Analysis –**  
 Unweighted and weighted univariate logistic regression analyses for vaccine hesitancy.

| Variable                      | Reference Group  | Univariate Analysis |              |              |           |     | Weighted Univariate Analysis |              |              |           |     |
|-------------------------------|------------------|---------------------|--------------|--------------|-----------|-----|------------------------------|--------------|--------------|-----------|-----|
|                               |                  | OR                  | Lower 95% CI | Upper 95% CI | P-Value   | Sig | OR                           | Lower 95% CI | Upper 95% CI | P-Value   | Sig |
| Female                        | Male             | 1.85                | 1.71         | 2.00         | 6.49E-53  | *** | 1.91                         | 1.74         | 2.09         | 2.54E-43  | *** |
| Age [18,30)                   | 65+              | 2.13                | 1.94         | 2.34         | 1.07E-54  | *** | 2.10                         | 1.87         | 2.36         | 4.58E-35  | *** |
| Age [30,45)                   |                  | 2.06                | 1.89         | 2.25         | 3.33E-61  | *** | 1.93                         | 1.73         | 2.15         | 4.81E-32  | *** |
| Age [45,55)                   |                  | 2.02                | 1.85         | 2.21         | 2.94E-54  | *** | 1.90                         | 1.69         | 2.13         | 1.13E-27  | *** |
| Age [55,65)                   |                  | 1.33                | 1.21         | 1.45         | 4.44E-10  | *** | 1.24                         | 1.11         | 1.39         | 0.0002    | **  |
| Essential Healthcare          | Nonessential     | 1.29                | 1.19         | 1.40         | 7.76E-10  | *** | 1.32                         | 1.19         | 1.46         | 1.01E-07  | *** |
| Other Essential               |                  | 1.68                | 1.55         | 1.82         | 5.03E-36  | *** | 1.56                         | 1.41         | 1.73         | 2.25E-17  | *** |
| Furloughed/Job Seeker         | Employed         | 1.30                | 1.17         | 1.44         | 1.31E-06  | *** | 1.52                         | 1.33         | 1.73         | 6.56E-10  | *** |
| Unemployed                    |                  | 0.74                | 0.69         | 0.79         | 3.34E-18  | *** | 0.83                         | 0.76         | 0.90         | 2.39E-05  | *** |
| African American/Black        | White            | 4.31                | 3.87         | 4.81         | 1.52E-152 | *** | 4.52                         | 4.01         | 5.10         | 1.14E-131 | *** |
| Hispanic/Latinx               |                  | 2.26                | 2.03         | 2.51         | 7.17E-53  | *** | 2.24                         | 2.00         | 2.52         | 2.73E-43  | *** |
| Asian                         |                  | 1.29                | 1.08         | 1.53         | 0.0044    | *   | 1.46                         | 1.21         | 1.77         | 0.0001    | **  |
| Multiracial/Other             |                  | 1.76                | 1.58         | 1.95         | 2.89E-26  | *** | 1.66                         | 1.47         | 1.89         | 2.37E-15  | *** |
| 1 Preexisting                 | 0                | 1.05                | 0.98         | 1.13         | 0.1794    |     | 1.05                         | 0.95         | 1.15         | 0.3305    |     |
| 2 Preexisting                 |                  | 1.02                | 0.94         | 1.10         | 0.7181    |     | 1.01                         | 0.91         | 1.12         | 0.8746    |     |
| 3+ Preexisting                |                  | 1.13                | 1.04         | 1.24         | 0.0037    | *   | 1.08                         | 0.97         | 1.21         | 0.1479    |     |
| Preexisting Not Say           |                  | 1.31                | 1.01         | 1.68         | 0.0392    | *   | 1.51                         | 1.08         | 2.09         | 0.0146    | *   |
| Parent                        | Not a Parent     | 1.04                | 0.69         | 1.52         | 0.8458    |     | 1.17                         | 0.72         | 1.90         | 0.5339    |     |
| Income 0-40K                  | 100K+            | 0.96                | 0.91         | 1.02         | 0.190     |     | 0.99                         | 0.92         | 1.06         | 0.7220    |     |
| Income 40-70K                 |                  | 2.74                | 2.40         | 3.12         | 3.95E-50  | *** | 2.69                         | 2.29         | 3.16         | 1.50E-33  | *** |
| Income 70-100K                |                  | 2.05                | 1.90         | 2.22         | 1.41E-76  | *** | 2.03                         | 1.84         | 2.24         | 8.79E-46  | *** |
| PopDensity 0-149              | 1000+            | 1.38                | 1.28         | 1.50         | 6.02E-16  | *** | 1.36                         | 1.22         | 1.50         | 6.30E-09  | *** |
| PopDensity 150-999            |                  | 1.57                | 1.45         | 1.71         | 1.03E-25  | *** | 1.37                         | 1.24         | 1.53         | 2.11E-09  | *** |
| West                          | Northeast        | 1.25                | 1.18         | 1.33         | 9.01E-14  | *** | 1.22                         | 1.13         | 1.32         | 2.20E-07  | *** |
| Midwest                       |                  | 1.21                | 1.12         | 1.30         | 5.33E-07  | *** | 1.07                         | 0.97         | 1.18         | 0.1640    |     |
| South                         |                  | 1.41                | 1.29         | 1.53         | 1.08E-15  | *** | 1.18                         | 1.06         | 1.31         | 0.0026    | *   |
| Practiced Protective Behavior | Did Not Practice | 1.06                | 1.05         | 1.07         | 1.32E-38  | *** | 1.04                         | 1.03         | 1.05         | 8.19E-15  | *** |

| <b>Answered before Pfizer EUA</b>             | <b>After Pfizer<br/>EUA</b>    |      |      |      |              |      |      |      |              |  |
|-----------------------------------------------|--------------------------------|------|------|------|--------------|------|------|------|--------------|--|
|                                               |                                | 1.15 | 1.09 | 1.21 | 8.79E-07 *** | 1.15 | 1.07 | 1.23 | 0.0001 **    |  |
| <b>State Cumulative Case Rate</b>             |                                | 1.71 | 1.59 | 1.83 | 3.99E-48 *** | 1.52 | 1.39 | 1.67 | 4.50E-19 *** |  |
| <b>State Cumulative Death Rate</b>            |                                | 1.09 | 1.07 | 1.11 | 5.12E-16 *** | 1.05 | 1.02 | 1.08 | 8.63E-05 *** |  |
| <b>Average Daily Pos Test Rate<br/>(Nov.)</b> |                                | 0.85 | 0.81 | 0.90 | 1.64E-08 *** | 0.96 | 0.90 | 1.04 | 0.3131       |  |
| <b>County % without HS<br/>Degree</b>         |                                | 1.03 | 1.03 | 1.04 | 3.11E-30 *** | 1.03 | 1.02 | 1.04 | 2.45E-16 *** |  |
| <b>Received COVID Test</b>                    | <b>Never<br/>Received Test</b> | 0.79 | 0.72 | 0.86 | 4.05E-08 *** | 0.78 | 0.70 | 0.87 | 9.41E-06 *** |  |

\*: p < 0.05

\*\* : p < 0.001

\*\*\*: p < 0.0001

**Supplementary Table 4: Multivariable Analysis – Unweighted and weighted multivariable logistic regression analyses for vaccine hesitancy.**

| Variable                      | Reference Group  | Multivariable Unweighted Analysis |              |              |           |     | Multivariable Weighted Analysis |              |              |          |     |
|-------------------------------|------------------|-----------------------------------|--------------|--------------|-----------|-----|---------------------------------|--------------|--------------|----------|-----|
|                               |                  | OR                                | Lower 95% CI | Upper 95% CI | P-Value   | Sig | OR                              | Lower 95% CI | Upper 95% CI | P-Value  | Sig |
| Female                        | Male             | 1.73                              | 1.59         | 1.88         | 1.41E-38  | *** | 1.67                            | 1.51         | 1.83         | 4.09E-25 | *** |
| Age [18,30)                   | 65+              | 1.96                              | 1.73         | 2.21         | 3.27E-27  | *** | 2.17                            | 1.86         | 2.53         | 1.03E-22 | *** |
| Age [30,45)                   |                  | 1.94                              | 1.75         | 2.15         | 1.15E-37  | *** | 2.02                            | 1.77         | 2.29         | 8.92E-27 | *** |
| Age [45,55)                   |                  | 1.89                              | 1.71         | 2.10         | 9.39E-35  | *** | 1.96                            | 1.72         | 2.23         | 1.52E-23 | *** |
| Age [55,65)                   |                  | 1.26                              | 1.15         | 1.39         | 2.11E-06  | *** | 1.27                            | 1.12         | 1.44         | 0.0002   | **  |
| Essential Healthcare          | Nonessential     | 1.18                              | 1.08         | 1.29         | 0.0002    | **  | 1.20                            | 1.08         | 1.33         | 0.0010   | *   |
| Other Essential               |                  | 1.57                              | 1.44         | 1.72         | 1.91E-24  | *** | 1.52                            | 1.36         | 1.70         | 1.42E-13 | *** |
| Furloughed/Job Seeker         | Employed         | 1.30                              | 1.16         | 1.45         | 4.40E-06  | *** | 1.48                            | 1.29         | 1.70         | 4.04E-08 | *** |
| Unemployed                    |                  | 0.99                              | 0.91         | 1.08         | 0.8267    |     | 1.13                            | 1.01         | 1.25         | 0.0275   | *   |
| African American/Black        | White            | 3.84                              | 3.42         | 4.31         | 2.80E-114 | *** | 3.94                            | 3.47         | 4.48         | 1.26E-96 | *** |
| Hispanic/Latinx               |                  | 1.85                              | 1.65         | 2.07         | 1.59E-26  | *** | 1.89                            | 1.67         | 2.14         | 1.99E-23 | *** |
| Asian                         |                  | 1.49                              | 1.24         | 1.78         | 1.71E-05  | *** | 1.80                            | 1.46         | 2.21         | 2.05E-08 | *** |
| Multiracial/Other             |                  | 1.55                              | 1.39         | 1.73         | 3.10E-15  | *** | 1.59                            | 1.39         | 1.81         | 8.11E-12 | *** |
| 1 Preexisting                 | 0                | 1.07                              | 0.99         | 1.15         | 0.0954    |     | 1.06                            | 0.96         | 1.17         | 0.2144   |     |
| 2 Preexisting                 |                  | 1.04                              | 0.95         | 1.13         | 0.4081    |     | 1.02                            | 0.92         | 1.14         | 0.6578   |     |
| 3+ Preexisting                |                  | 1.25                              | 1.14         | 1.37         | 2.47E-06  | *** | 1.19                            | 1.06         | 1.34         | 0.0036   | *   |
| Preexisting Not Say           |                  | 1.39                              | 1.05         | 1.81         | 0.0169    | *   | 1.58                            | 1.09         | 2.30         | 0.0161   | *   |
| Parent                        | Not a Parent     | 1.20                              | 1.12         | 1.29         | 2.25E-07  | *** | 1.26                            | 1.15         | 1.38         | 9.61E-07 | *** |
| Income 0-40K                  | 100K+            | 1.64                              | 1.42         | 1.90         | 4.20E-11  | *** | 1.66                            | 1.39         | 1.98         | 2.33E-08 | *** |
| Income 40-70K                 |                  | 1.56                              | 1.43         | 1.70         | 2.69E-24  | *** | 1.58                            | 1.42         | 1.77         | 1.85E-16 | *** |
| Income 70-100K                |                  | 1.24                              | 1.14         | 1.35         | 2.85E-07  | *** | 1.21                            | 1.08         | 1.34         | 0.0005   | **  |
| PopDensity 0-149              | 1000+            | 1.34                              | 1.21         | 1.47         | 4.84E-09  | *** | 1.32                            | 1.18         | 1.49         | 3.86E-06 | *** |
| PopDensity 150-999            |                  | 1.22                              | 1.14         | 1.30         | 5.18E-09  | *** | 1.27                            | 1.16         | 1.38         | 5.02E-08 | *** |
| West                          | Northeast        | 1.01                              | 0.87         | 1.18         | 0.8896    |     | 1.02                            | 0.83         | 1.23         | 0.8805   |     |
| Midwest                       |                  | 1.12                              | 0.97         | 1.28         | 0.1227    |     | 1.11                            | 0.93         | 1.32         | 0.2364   |     |
| South                         |                  | 1.28                              | 1.12         | 1.47         | 0.0004    | **  | 1.25                            | 1.05         | 1.48         | 0.0105   | *   |
| Answered before Pfizer EUA    | After Pfizer EUA | 1.46                              | 1.37         | 1.55         | 5.32E-33  | *** | 1.48                            | 1.37         | 1.60         | 9.96E-23 | *** |
| Practiced Protective Behavior | Did Not Practice | 0.79                              | 0.74         | 0.84         | 6.95E-13  | *** | 0.78                            | 0.72         | 0.85         | 6.12E-09 | *** |

|                                           |                            |      |      |              |              |      |      |          |              |
|-------------------------------------------|----------------------------|------|------|--------------|--------------|------|------|----------|--------------|
| <b>State Cumulative Case Rate</b>         | 1.00                       | 0.97 | 1.03 | 0.9449       | 1.01         | 0.97 | 1.04 | 0.7826   |              |
| <b>State Cumulative Death Rate</b>        | 1.20                       | 1.07 | 1.36 | 0.0030 *     | 1.18         | 1.01 | 1.38 | 0.0351 * |              |
| <b>Average Daily Pos Test Rate (Nov.)</b> | 1.01                       | 0.99 | 1.02 | 0.4374       | 1.00         | 0.99 | 1.02 | 0.9654   |              |
| <b>County % without HS Degree</b>         | 1.02                       | 1.01 | 1.02 | 3.21E-05 *** | 1.01         | 1.00 | 1.02 | 0.0819   |              |
| <b>Received COVID Test</b>                |                            |      |      |              |              |      |      |          |              |
|                                           | <b>Never Received Test</b> |      |      |              |              |      |      |          |              |
|                                           |                            | 0.79 | 0.72 | 0.87         | 3.10E-07 *** | 0.79 | 0.71 | 0.89     | 5.88E-05 *** |

\*:  $p < 0.05$

\*\* :  $p < 0.001$

\*\*\*:  $p < 0.0001$

**Supplementary Table 5: Nominal Unweighted** – Unweighted nominal logistic regression analyses comparing “Undecided” vs “Likely” (Left) and “Unlikely” vs “Likely”.

| Variable                      | Reference Group  | Undecided |              |              |          |     | Unlikely |              |              |          |     |
|-------------------------------|------------------|-----------|--------------|--------------|----------|-----|----------|--------------|--------------|----------|-----|
|                               |                  | OR        | Lower 95% CI | Upper 95% CI | P-Value  | Sig | OR       | Lower 95% CI | Upper 95% CI | P-Value  | Sig |
| Female                        | Male             | 1.88      | 1.70         | 2.08         | 2.68E-33 | *** | 1.51     | 1.33         | 1.71         | 1.18E-10 | *** |
| Age [18,30)                   | 65+              | 1.91      | 1.65         | 2.22         | 1.29E-17 | *** | 2.04     | 1.69         | 2.45         | 4.23E-14 | *** |
| Age [30,45)                   |                  | 1.92      | 1.69         | 2.17         | 7.23E-25 | *** | 1.98     | 1.70         | 2.31         | 3.37E-18 | *** |
| Age [45,55)                   |                  | 1.92      | 1.70         | 2.18         | 4.64E-25 | *** | 1.84     | 1.58         | 2.15         | 1.39E-14 | *** |
| Age [55,65)                   |                  | 1.31      | 1.17         | 1.48         | 4.64E-06 | *** | 1.17     | 1.01         | 1.36         | 0.0387   | *   |
| Essential Healthcare          | Nonessential     | 1.18      | 1.06         | 1.31         | 0.0022   | *   | 1.18     | 1.03         | 1.35         | 0.0152   | *   |
| Other Essential               |                  | 1.56      | 1.41         | 1.73         | 7.61E-17 | *** | 1.60     | 1.40         | 1.82         | 1.42E-12 | *** |
| Furloughed/Job Seeker         | Employed         | 1.25      | 1.09         | 1.43         | 0.0013   | *   | 1.39     | 1.18         | 1.64         | 9.21E-05 | *** |
| Unemployed                    |                  | 0.92      | 0.83         | 1.02         | 0.1067   |     | 1.12     | 0.99         | 1.27         | 0.0769   | *   |
| African American/Black        | White            | 3.63      | 3.17         | 4.17         | 1.33E-75 | *** | 4.19     | 3.57         | 4.91         | 5.62E-70 | *** |
| Hispanic/Latinx               |                  | 1.95      | 1.71         | 2.23         | 1.25E-22 | *** | 1.69     | 1.43         | 2.01         | 1.96E-09 | *** |
| Asian                         |                  | 1.77      | 1.44         | 2.18         | 5.61E-08 | *** | 1.01     | 0.73         | 1.41         | 0.9298   |     |
| Multiracial/Other             |                  | 1.51      | 1.32         | 1.72         | 2.02E-09 | *** | 1.63     | 1.39         | 1.91         | 2.33E-09 | *** |
| 1 Preexisting                 | 0                | 1.07      | 0.97         | 1.17         | 0.1557   |     | 1.07     | 0.95         | 1.20         | 0.3002   |     |
| 2 Preexisting                 |                  | 1.00      | 0.90         | 1.11         | 0.9525   |     | 1.11     | 0.97         | 1.26         | 0.1259   |     |
| 3+ Preexisting                |                  | 1.21      | 1.08         | 1.35         | 0.0007   | **  | 1.31     | 1.14         | 1.51         | 0.0001   | **  |
| Preexisting Not Say           |                  | 1.21      | 0.86         | 1.70         | 0.2642   |     | 1.71     | 1.17         | 2.49         | 0.0058   | *   |
| Parent                        | Not a Parent     | 1.17      | 1.07         | 1.27         | 0.0003   | **  | 1.27     | 1.14         | 1.41         | 1.77E-05 | *** |
| Income 0-40K                  | 100K+            | 1.69      | 1.42         | 2.02         | 5.78E-09 | *** | 1.56     | 1.26         | 1.94         | 6.17E-05 | *** |
| Income 40-70K                 |                  | 1.57      | 1.42         | 1.75         | 1.86E-17 | *** | 1.54     | 1.35         | 1.76         | 1.81E-10 | *** |
| Income 70-100K                |                  | 1.28      | 1.16         | 1.41         | 1.56E-06 | *** | 1.18     | 1.04         | 1.34         | 0.0126   | *   |
| PopDensity 0-149              | 1000+            | 1.31      | 1.17         | 1.48         | 5.08E-06 | *** | 1.38     | 1.19         | 1.60         | 1.61E-05 | *** |
| PopDensity 150-999            |                  | 1.13      | 1.05         | 1.23         | 0.0022   | *   | 1.38     | 1.24         | 1.52         | 6.71E-10 | *** |
| West                          | Northeast        | 0.95      | 0.79         | 1.14         | 0.5796   |     | 1.14     | 0.90         | 1.44         | 0.2846   |     |
| Midwest                       |                  | 1.03      | 0.87         | 1.22         | 0.7064   |     | 1.28     | 1.04         | 1.59         | 0.0214   | *   |
| South                         |                  | 1.13      | 0.96         | 1.34         | 0.1353   |     | 1.58     | 1.28         | 1.94         | 1.58E-05 | *** |
| Answered before Pfizer EUA    | After Pfizer EUA | 1.59      | 1.47         | 1.71         | 5.40E-34 | *** | 1.26     | 1.15         | 1.38         | 1.52E-06 | *** |
| Practiced Protective Behavior | Did Not Practice | 0.82      | 0.76         | 0.89         | 8.19E-07 | *** | 0.73     | 0.66         | 0.81         | 1.59E-09 | *** |



|                                           |                            |      |      |      |           |      |      |      |              |
|-------------------------------------------|----------------------------|------|------|------|-----------|------|------|------|--------------|
| <b>State Cumulative Case Rate</b>         |                            | 1.01 | 0.97 | 1.05 | 0.7091    | 0.99 | 0.95 | 1.04 | 0.7155       |
| <b>State Cumulative Death Rate</b>        |                            | 1.21 | 1.04 | 1.41 | 0.0116 *  | 1.19 | 0.99 | 1.44 | 0.0638       |
| <b>Average Daily Pos Test Rate (Nov.)</b> |                            | 1.01 | 0.99 | 1.03 | 0.1945    | 1.00 | 0.98 | 1.02 | 0.6997       |
| <b>County % without HS Degree</b>         |                            | 1.01 | 1.00 | 1.02 | 0.0152 *  | 1.02 | 1.01 | 1.03 | 3.29E-05 *** |
| <b>Received COVID Test</b>                | <b>Never Received Test</b> | 0.82 | 0.74 | 0.92 | 0.0004 ** | 0.74 | 0.64 | 0.85 | 2.44E-05 *** |

\*:  $p < 0.05$

\*\* :  $p < 0.001$

\*\*\*:  $p < 0.0001$

**Supplementary Table 6: Nominal Weighted –**  
Weighted nominal logistic regression analyses.

| Variable                         | Reference Group  | Undecided Weighted |              |              |          |     | Unlikely Weighted |              |              |          |     |
|----------------------------------|------------------|--------------------|--------------|--------------|----------|-----|-------------------|--------------|--------------|----------|-----|
|                                  |                  | OR                 | Lower 95% CI | Upper 95% CI | P-Value  | Sig | OR                | Lower 95% CI | Upper 95% CI | P-Value  | Sig |
| Female                           | Male             | 1.80               | 1.59         | 2.02         | 1.21E-21 | *** | 1.51              | 1.29         | 1.72         | 1.05E-07 | *** |
| Age [18,30)                      | 65+              | 1.94               | 1.61         | 2.35         | 6.09E-12 | *** | 2.04              | 2.01         | 3.24         | 1.40E-14 | *** |
| Age [30,45)                      |                  | 1.94               | 1.65         | 2.27         | 3.08E-16 | *** | 1.98              | 1.78         | 2.63         | 7.86E-15 | *** |
| Age [45,55)                      |                  | 1.98               | 1.68         | 2.32         | 2.23E-16 | *** | 1.84              | 1.58         | 2.36         | 1.43E-10 | *** |
| Age [55,65)                      |                  | 1.31               | 1.13         | 1.53         | 0.0005   | **  | 1.17              | 0.97         | 1.43         | 0.0954   |     |
| Essential Healthcare             | Nonessential     | 1.22               | 1.07         | 1.39         | 0.0028   | *   | 1.18              | 0.98         | 1.37         | 0.0813   |     |
| Other Essential                  |                  | 1.49               | 1.30         | 1.71         | 7.14E-09 | *** | 1.60              | 1.32         | 1.83         | 1.70E-07 | *** |
| Furloughed/Job Seeker            | Employed         | 1.50               | 1.27         | 1.78         | 2.61E-06 | *** | 1.39              | 1.18         | 1.78         | 0.0004   | **  |
| Unemployed                       |                  | 1.07               | 0.94         | 1.22         | 0.3332   |     | 1.12              | 1.04         | 1.44         | 0.0133   | *   |
| African American/Black           | White            | 3.90               | 3.34         | 4.56         | 1.39E-66 | *** | 4.19              | 3.38         | 4.79         | 1.65E-54 | *** |
| Hispanic/Latinx                  |                  | 2.04               | 1.76         | 2.37         | 6.98E-21 | *** | 1.69              | 1.39         | 2.03         | 8.68E-08 | *** |
| Asian                            |                  | 2.12               | 1.68         | 2.68         | 2.56E-10 | *** | 1.01              | 0.86         | 1.76         | 0.2606   |     |
| Multiracial/Other                |                  | 1.56               | 1.32         | 1.83         | 7.17E-08 | *** | 1.63              | 1.35         | 1.99         | 8.13E-07 | *** |
| 1 Preexisting                    | 0                | 1.08               | 0.96         | 1.22         | 0.1770   |     | 1.07              | 0.89         | 1.21         | 0.6269   |     |
| 2 Preexisting                    |                  | 0.96               | 0.85         | 1.10         | 0.5888   |     | 1.11              | 0.95         | 1.32         | 0.1822   |     |
| 3+ Preexisting                   |                  | 1.15               | 1.00         | 1.33         | 0.0535   |     | 1.31              | 1.02         | 1.46         | 0.0266   | *   |
| Preexisting Not Say              |                  | 1.33               | 0.83         | 2.13         | 0.2373   |     | 1.71              | 1.12         | 3.12         | 0.0169   | *   |
| Parent                           | Not a Parent     | 1.17               | 1.05         | 1.31         | 0.0052   | *   | 1.27              | 1.26         | 1.68         | 2.86E-07 | *** |
| Income 0-40K                     | 100K+            | 1.75               | 1.41         | 2.18         | 3.26E-07 | *** | 1.56              | 1.21         | 2.05         | 0.0008   | **  |
| Income 40-70K                    |                  | 1.62               | 1.42         | 1.85         | 1.74E-12 | *** | 1.54              | 1.31         | 1.83         | 3.75E-07 | *** |
| Income 70-100K                   |                  | 1.25               | 1.10         | 1.42         | 0.0008   | **  | 1.18              | 0.97         | 1.35         | 0.1152   |     |
| PopDensity 0-149                 | 1000+            | 1.31               | 1.14         | 1.51         | 0.0002   | **  | 1.38              | 1.11         | 1.59         | 0.0019   | **  |
| PopDensity 150-999               |                  | 1.17               | 1.06         | 1.30         | 0.0025   | *   | 1.38              | 1.24         | 1.59         | 1.52E-07 | *** |
| West                             | Northeast        | 0.96               | 0.75         | 1.22         | 0.7255   |     | 1.14              | 0.83         | 1.49         | 0.4735   |     |
| Midwest                          |                  | 1.03               | 0.84         | 1.28         | 0.7637   |     | 1.28              | 0.97         | 1.62         | 0.0827   |     |
| South                            |                  | 1.10               | 0.89         | 1.36         | 0.3716   |     | 1.58              | 1.19         | 1.97         | 0.0008   | **  |
| Answered before Pfizer EUA       | After Pfizer EUA | 1.60               | 1.45         | 1.76         | 1.51E-21 | *** | 1.26              | 1.18         | 1.50         | 2.68E-06 | *** |
| Mask Wearing/Protective Measures | Did Not Practice | 0.82               | 0.74         | 0.90         | 8.80E-05 | *** | 0.73              | 0.64         | 0.83         | 1.56E-06 | *** |

|                                           |                            |      |      |      |          |      |      |      |          |
|-------------------------------------------|----------------------------|------|------|------|----------|------|------|------|----------|
| <b>State Cumulative Case Rate</b>         |                            | 1.01 | 0.97 | 1.06 | 0.5969   | 0.99 | 0.94 | 1.05 | 0.8213   |
| <b>State Cumulative Death Rate</b>        |                            | 1.18 | 0.97 | 1.43 | 0.0919   | 1.19 | 0.94 | 1.49 | 0.1448   |
| <b>Average Daily Pos Test Rate (Nov.)</b> |                            | 1.00 | 0.99 | 1.02 | 0.6512   | 1.00 | 0.97 | 1.02 | 0.5181   |
| <b>County % without HS Degree</b>         |                            | 1.01 | 1.00 | 1.02 | 0.2902   | 1.02 | 1.00 | 1.02 | 0.1312   |
| <b>Received COVID Test</b>                | <b>Never Received Test</b> | 0.82 | 0.72 | 0.94 | 0.0050 * | 0.74 | 0.62 | 0.89 | 0.0013 * |

\*:  $p < 0.05$

\*\* :  $p < 0.001$

\*\*\*:  $p < 0.0001$

**Supplementary Table 7: Sensitivity Multivariable** – Sensitivity analysis for the multivariable logistic regression analysis for vaccine hesitancy using a new weight threshold of 0.1 to 5.

|                                      |                         | <b>Multivariable Sensitivity Analysis for Weight Thresholds (0.1,5)</b> |              |              |          |             |
|--------------------------------------|-------------------------|-------------------------------------------------------------------------|--------------|--------------|----------|-------------|
| Variable                             | Reference Group         | OR                                                                      | Lower 95% CI | Upper 95% CI | P-Value  | Significant |
| <b>Female</b>                        | <b>Male</b>             | 1.65                                                                    | 1.48         | 1.83         | 5.93E-21 | ***         |
| <b>Age [18,30)</b>                   | <b>65+</b>              | 2.26                                                                    | 1.91         | 2.68         | 6.15E-21 | ***         |
| <b>Age [30,45)</b>                   |                         | 2.03                                                                    | 1.77         | 2.34         | 4.37E-23 | ***         |
| <b>Age [45,55)</b>                   |                         | 1.98                                                                    | 1.71         | 2.28         | 1.05E-20 | ***         |
| <b>Age [55,65)</b>                   |                         | 1.27                                                                    | 1.11         | 1.46         | 0.0005   | **          |
| <b>Essential Healthcare</b>          | <b>Nonessential</b>     | 1.20                                                                    | 1.07         | 1.35         | 0.0022   | *           |
| <b>Other Essential</b>               |                         | 1.50                                                                    | 1.33         | 1.70         | 1.35E-10 | ***         |
| <b>Furloughed/Job Seeker</b>         | <b>Employed</b>         | 1.48                                                                    | 1.27         | 1.72         | 4.37E-07 | ***         |
| <b>Unemployed</b>                    |                         | 1.17                                                                    | 1.04         | 1.31         | 0.0097   | *           |
| <b>African American/Black</b>        | <b>White</b>            | 3.83                                                                    | 3.33         | 4.39         | 4.11E-80 | ***         |
| <b>Hispanic/Latinx</b>               |                         | 1.91                                                                    | 1.67         | 2.19         | 7.94E-21 | ***         |
| <b>Asian</b>                         |                         | 1.80                                                                    | 1.46         | 2.22         | 3.93E-08 | ***         |
| <b>Multiracial/Other</b>             |                         | 1.57                                                                    | 1.36         | 1.81         | 1.24E-09 | ***         |
| <b>1 Preexisting</b>                 | <b>0</b>                | 1.07                                                                    | 0.96         | 1.19         | 0.2529   |             |
| <b>2 Preexisting</b>                 |                         | 1.02                                                                    | 0.90         | 1.15         | 0.7673   |             |
| <b>3+ Preexisting</b>                |                         | 1.19                                                                    | 1.05         | 1.36         | 0.0082   | *           |
| <b>Preexisting Not Say</b>           |                         | 1.61                                                                    | 1.06         | 2.43         | 0.0248   | *           |
| <b>Parent</b>                        | <b>Not a Parent</b>     | 1.28                                                                    | 1.16         | 1.42         | 2.28E-06 | ***         |
| <b>Income 0-40K</b>                  | <b>100K+</b>            | 1.70                                                                    | 1.40         | 2.08         | 1.40E-07 | ***         |
| <b>Income 40-70K</b>                 |                         | 1.59                                                                    | 1.41         | 1.80         | 1.02E-13 | ***         |
| <b>Income 70-100K</b>                |                         | 1.19                                                                    | 1.06         | 1.34         | 0.0040   | *           |
| <b>PopDensity 0-149</b>              | <b>1000+</b>            | 1.30                                                                    | 1.14         | 1.48         | 9.26E-05 | ***         |
| <b>PopDensity 150-999</b>            |                         | 1.29                                                                    | 1.17         | 1.42         | 1.90E-07 | ***         |
| <b>West</b>                          | <b>Northeast</b>        | 1.01                                                                    | 0.81         | 1.25         | 0.9410   |             |
| <b>Midwest</b>                       |                         | 1.10                                                                    | 0.90         | 1.33         | 0.3495   |             |
| <b>South</b>                         |                         | 1.26                                                                    | 1.04         | 1.52         | 0.0180   | *           |
| <b>Answered before Pfizer EUA</b>    | <b>After Pfizer EUA</b> | 1.47                                                                    | 1.35         | 1.61         | 2.73E-18 | ***         |
| <b>Practiced Protective Behavior</b> | <b>Did Not Practice</b> | 0.78                                                                    | 0.71         | 0.85         | 1.04E-07 | ***         |
| <b>State Cumulative Case Rate</b>    |                         | 1.01                                                                    | 0.97         | 1.05         | 0.6396   |             |
| <b>State Cumulative Death Rate</b>   |                         | 1.17                                                                    | 0.99         | 1.39         | 0.0650   |             |

|                                           |                            |      |      |      |          |     |
|-------------------------------------------|----------------------------|------|------|------|----------|-----|
| <b>Average Daily Pos Test Rate (Nov.)</b> |                            | 1.00 | 0.98 | 1.01 | 0.7254   |     |
| <b>County % without HS Degree</b>         |                            | 1.00 | 1.00 | 1.01 | 0.2847   |     |
| <b>Received COVID Test</b>                | <b>Never Received Test</b> | 0.78 | 0.68 | 0.88 | 6.52E-05 | *** |

\*:  $p < 0.05$

\*\* :  $p < 0.001$

\*\*\*:  $p < 0.0001$

**Supplementary Table 8: Sensitivity Nominal** - Sensitivity analysis for the nominal logistic regression analysis using a new weight threshold of 0.1 to 5. Left: logistic regression analyses comparing “Undecided” vs “Likely” and right: logistic regression analyses comparing “Unlikely” vs “Likely”.

| Variable               | Reference Group | Undecided Sensitivity<br>Weights (0.1, 5) |              |              |          |     | Unlikely Sensitivity<br>Weights (0.1, 5) |              |              |          |     |
|------------------------|-----------------|-------------------------------------------|--------------|--------------|----------|-----|------------------------------------------|--------------|--------------|----------|-----|
|                        |                 | OR                                        | Lower 95% CI | Upper 95% CI | P-Value  | Sig | OR                                       | Lower 95% CI | Upper 95% CI | P-Value  | Sig |
| Female                 | Male            | 1.79                                      | 1.57         | 2.03         | 1.08E-18 | *** | 1.46                                     | 1.25         | 1.71         | 2.57E-06 | *** |
| Age [18,30)            | 65+             | 1.92                                      | 1.56         | 2.36         | 5.62E-10 | *** | 2.87                                     | 2.21         | 3.73         | 3.53E-15 | *** |
| Age [30,45)            |                 | 1.91                                      | 1.61         | 2.28         | 1.79E-13 | *** | 2.24                                     | 1.82         | 2.77         | 8.28E-14 | *** |
| Age [45,55)            |                 | 1.97                                      | 1.65         | 2.35         | 4.60E-14 | *** | 1.98                                     | 1.59         | 2.46         | 5.94E-10 | *** |
| Age [55,65)            |                 | 1.30                                      | 1.10         | 1.54         | 0.0019   | *   | 1.20                                     | 0.98         | 1.48         | 0.0848   |     |
| Essential Healthcare   | Nonessential    | 1.23                                      | 1.06         | 1.41         | 0.0049   | *   | 1.16                                     | 0.97         | 1.39         | 0.1058   |     |
| Other Essential        |                 | 1.48                                      | 1.27         | 1.72         | 3.81E-07 | *** | 1.52                                     | 1.27         | 1.82         | 6.39E-06 | *** |
| Furloughed/Job Seeker  | Employed        | 1.52                                      | 1.27         | 1.83         | 6.91E-06 | *** | 1.42                                     | 1.13         | 1.78         | 0.0022   | *   |
| Unemployed             |                 | 1.10                                      | 0.96         | 1.27         | 0.1748   |     | 1.27                                     | 1.06         | 1.51         | 0.0095   | *   |
| African American/Black | White           | 3.87                                      | 3.28         | 4.57         | 1.92E-57 | *** | 3.77                                     | 3.13         | 4.56         | 2.57E-43 | *** |
| Hispanic/Latinx        |                 | 2.11                                      | 1.79         | 2.48         | 3.34E-19 | *** | 1.65                                     | 1.35         | 2.03         | 1.26E-06 | *** |
| Asian                  |                 | 2.14                                      | 1.69         | 2.72         | 3.97E-10 | *** | 1.20                                     | 0.84         | 1.73         | 0.3201   |     |
| Multiracial/Other      |                 | 1.55                                      | 1.30         | 1.84         | 8.74E-07 | *** | 1.60                                     | 1.29         | 1.98         | 2.16E-05 | *** |
| 1 Preexisting          | 0               | 1.09                                      | 0.96         | 1.25         | 0.1766   |     | 1.03                                     | 0.87         | 1.22         | 0.7387   |     |
| 2 Preexisting          |                 | 0.95                                      | 0.82         | 1.10         | 0.4932   |     | 1.12                                     | 0.93         | 1.35         | 0.2247   |     |
| 3+ Preexisting         |                 | 1.15                                      | 0.98         | 1.35         | 0.0768   |     | 1.22                                     | 1.00         | 1.49         | 0.0481   | *   |
| Preexisting Not Say    |                 | 1.34                                      | 0.79         | 2.27         | 0.2733   |     | 1.90                                     | 1.09         | 3.32         | 0.0246   | *   |
| Parent                 | Not a Parent    | 1.17                                      | 1.03         | 1.33         | 0.0127   | *   | 1.52                                     | 1.30         | 1.78         | 2.84E-07 | *** |
| Income 0-40K           | 100K+           | 1.79                                      | 1.41         | 2.28         | 2.14E-06 | *** | 1.62                                     | 1.21         | 2.17         | 0.0013   | *   |
| Income 40-70K          |                 | 1.62                                      | 1.39         | 1.88         | 2.75E-10 | *** | 1.56                                     | 1.30         | 1.88         | 2.51E-06 | *** |
| Income 70-100K         |                 | 1.23                                      | 1.07         | 1.42         | 0.0049   | *   | 1.13                                     | 0.94         | 1.36         | 0.1918   |     |
| PopDensity 0-149       | 1000+           | 1.27                                      | 1.09         | 1.49         | 0.0022   | *   | 1.32                                     | 1.08         | 1.61         | 0.0071   | *   |
| PopDensity 150-999     |                 | 1.19                                      | 1.06         | 1.34         | 0.0039   | *   | 1.43                                     | 1.25         | 1.65         | 4.86E-07 | *** |
| West                   | Northeast       | 0.92                                      | 0.70         | 1.20         | 0.5409   |     | 1.17                                     | 0.84         | 1.61         | 0.3498   |     |
| Midwest                |                 | 0.99                                      | 0.79         | 1.26         | 0.9603   |     | 1.29                                     | 0.97         | 1.70         | 0.0779   |     |
| South                  |                 | 1.07                                      | 0.85         | 1.35         | 0.5636   |     | 1.62                                     | 1.23         | 2.14         | 0.0006   | **  |

|                                           |                                |      |      |      |              |      |      |      |              |
|-------------------------------------------|--------------------------------|------|------|------|--------------|------|------|------|--------------|
| <b>Answered before Pfizer EUA</b>         | <b>After Pfizer<br/>EUA</b>    | 1.59 | 1.43 | 1.77 | 1.09E-17 *** | 1.33 | 1.16 | 1.51 | 2.65E-05 *** |
| <b>Practiced Protective Behavior</b>      | <b>Did Not<br/>Practice</b>    | 0.81 | 0.73 | 0.91 | 0.0003 **    | 0.73 | 0.64 | 0.84 | 1.34E-05 *** |
| <b>State Cumulative Case Rate</b>         |                                | 1.02 | 0.97 | 1.07 | 0.5056       | 1.00 | 0.94 | 1.06 | 0.9572       |
| <b>State Cumulative Death Rate</b>        |                                | 1.14 | 0.93 | 1.41 | 0.2149       | 1.23 | 0.96 | 1.57 | 0.1046       |
| <b>Average Daily Pos Test Rate (Nov.)</b> |                                | 1.00 | 0.98 | 1.02 | 0.8418       | 0.99 | 0.96 | 1.01 | 0.2928       |
| <b>County % without HS Degree</b>         |                                | 1.00 | 0.99 | 1.01 | 0.4943       | 1.01 | 0.99 | 1.02 | 0.4032       |
| <b>Received COVID Test</b>                | <b>Never<br/>Received Test</b> | 0.81 | 0.70 | 0.94 | 0.0060 *     | 0.72 | 0.60 | 0.88 | 0.0010 *     |

\*:  $p < 0.05$

\*\* :  $p < 0.001$

\*\*\*:  $p < 0.0001$

**Supplementary Table 9: Receiving Test** – Weighted logistic regression analysis for receiving a COVID-19 test.

| Name                                 | Reference Group         | Probability of Receiving a COVID Test |                 |                 |          |     |
|--------------------------------------|-------------------------|---------------------------------------|-----------------|-----------------|----------|-----|
|                                      |                         | OR                                    | Lower 95%<br>CI | Upper 95%<br>CI | P-Value  | Sig |
| <b>Female</b>                        | <b>Male</b>             | 0.92                                  | 0.84            | 1.01            | 0.0939   |     |
| <b>Age [18,30)</b>                   | <b>65+</b>              | 0.68                                  | 0.58            | 0.81            | 8.46E-06 | *** |
| <b>Age [30,45)</b>                   |                         | 0.82                                  | 0.71            | 0.93            | 0.0032   | *   |
| <b>Age [45,55)</b>                   |                         | 0.91                                  | 0.79            | 1.04            | 0.1670   |     |
| <b>Age [55,65)</b>                   |                         | 0.91                                  | 0.81            | 1.03            | 0.1455   |     |
| <b>Essential Healthcare</b>          | <b>Nonessential</b>     | 2.12                                  | 1.91            | 2.36            | 9.19E-46 | *** |
| <b>Other Essential</b>               |                         | 0.97                                  | 0.85            | 1.11            | 0.6502   |     |
| <b>Furloughed/Job Seeker</b>         | <b>Employed</b>         | 0.93                                  | 0.79            | 1.10            | 0.4023   |     |
| <b>Unemployed</b>                    |                         | 0.84                                  | 0.75            | 0.94            | 0.0022   | *   |
| <b>African American/Black</b>        | <b>White</b>            | 0.98                                  | 0.82            | 1.16            | 0.7966   |     |
| <b>Hispanic/Latinx</b>               |                         | 0.88                                  | 0.75            | 1.03            | 0.1138   |     |
| <b>Asian</b>                         |                         | 0.96                                  | 0.77            | 1.21            | 0.7582   |     |
| <b>Multiracial/Other</b>             |                         | 0.96                                  | 0.81            | 1.13            | 0.5965   |     |
| <b>1 Preexisting</b>                 | <b>0</b>                | 1.04                                  | 0.93            | 1.16            | 0.4715   |     |
| <b>2 Preexisting</b>                 |                         | 1.12                                  | 1.00            | 1.27            | 0.0597   |     |
| <b>3+ Preexisting</b>                |                         | 1.48                                  | 1.31            | 1.68            | 6.57E-10 | *** |
| <b>Preexisting Not Say</b>           |                         | 0.71                                  | 0.39            | 1.28            | 0.2550   |     |
| <b>Parent</b>                        | <b>Not a Parent</b>     | 0.95                                  | 0.87            | 1.05            | 0.3121   |     |
| <b>Income 0-40K</b>                  | <b>100K+</b>            | 1.06                                  | 0.86            | 1.32            | 0.5750   |     |
| <b>Income 40-70K</b>                 |                         | 0.99                                  | 0.89            | 1.11            | 0.9141   |     |
| <b>Income 70-100K</b>                |                         | 1.02                                  | 0.92            | 1.13            | 0.7056   |     |
| <b>PopDensity 0-149</b>              | <b>1000+</b>            | 0.78                                  | 0.67            | 0.90            | 0.0007   | **  |
| <b>PopDensity 150-999</b>            |                         | 0.86                                  | 0.78            | 0.94            | 0.0012   | *   |
| <b>West</b>                          | <b>Northeast</b>        | 1.26                                  | 1.01            | 1.57            | 0.0438   | *   |
| <b>Midwest</b>                       |                         | 0.81                                  | 0.66            | 0.99            | 0.0394   | *   |
| <b>South</b>                         |                         | 1.17                                  | 0.97            | 1.42            | 0.0982   |     |
| <b>Answered before Pfizer EUA</b>    | <b>After Pfizer EUA</b> | 0.99                                  | 0.91            | 1.08            | 0.9030   |     |
| <b>Practiced Protective Behavior</b> | <b>Did Not Practice</b> | 1.02                                  | 0.94            | 1.12            | 0.6097   |     |



|                                           |      |      |      |              |
|-------------------------------------------|------|------|------|--------------|
| <b>State Cumulative Case Rate</b>         | 1.08 | 1.04 | 1.14 | 0.0005 **    |
| <b>State Cumulative Death Rate</b>        | 1.40 | 1.18 | 1.68 | 0.0002 **    |
| <b>Average Daily Pos Test Rate (Nov.)</b> | 0.95 | 0.94 | 0.97 | 4.12E-06 *** |
| <b>County % without HS Degree</b>         | 1.01 | 1.00 | 1.02 | 0.0240 *     |

\*:  $p < 0.05$

\*\* :  $p < 0.001$

\*\*\*:  $p < 0.0001$

**Supplementary Table 10: IPW Analysis** – IPW analysis utilizing the probability of receiving a COVID-19 test as an inverse probability weight.

| Variable               | Reference Group | IPW Trim (0.5,0.95) n=4,837 |              |              |          |     | IPW Trim (0.1,0.9) n=4,837 |              |              |          |     |
|------------------------|-----------------|-----------------------------|--------------|--------------|----------|-----|----------------------------|--------------|--------------|----------|-----|
|                        |                 | OR                          | Lower 95% CI | Upper 95% CI | P-Value  | Sig | OR                         | Lower 95% CI | Upper 95% CI | P-Value  | Sig |
| Female                 | Male            | 1.62                        | 1.24         | 2.10         | 0.0003   | **  | 1.62                       | 1.25         | 2.10         | 0.0003   | **  |
| Age [18,30)            | 65+             | 2.64                        | 1.72         | 4.05         | 8.47E-06 | *** | 2.68                       | 1.77         | 4.07         | 3.32E-06 | *** |
| Age [30,45)            |                 | 2.03                        | 1.46         | 2.84         | 3.24E-05 | *** | 2.01                       | 1.45         | 2.79         | 2.86E-05 | *** |
| Age [45,55)            |                 | 2.07                        | 1.50         | 2.87         | 1.11E-05 | *** | 2.04                       | 1.49         | 2.81         | 1.07E-05 | *** |
| Age [55,65)            |                 | 1.42                        | 1.06         | 1.90         | 0.0193   | *   | 1.42                       | 1.06         | 1.89         | 0.0175   | *   |
| Essential Healthcare   | Nonessential    | 1.28                        | 1.04         | 1.59         | 0.0201   | *   | 1.28                       | 1.04         | 1.58         | 0.0207   | *   |
| Other Essential        |                 | 1.16                        | 0.87         | 1.53         | 0.3193   |     | 1.14                       | 0.87         | 1.51         | 0.3434   |     |
| Furloughed/Job Seeker  | Employed        | 1.20                        | 0.85         | 1.70         | 0.2991   |     | 1.23                       | 0.88         | 1.74         | 0.2279   |     |
| Unemployed             |                 | 0.97                        | 0.74         | 1.27         | 0.8379   |     | 0.98                       | 0.75         | 1.27         | 0.8633   |     |
| African American/Black | White           | 4.01                        | 2.87         | 5.61         | 6.26E-16 | *** | 3.98                       | 2.85         | 5.55         | 5.20E-16 | *** |
| Hispanic/Latinx        |                 | 1.83                        | 1.28         | 2.63         | 0.0009   | **  | 1.79                       | 1.26         | 2.53         | 0.0010   | *   |
| Asian                  |                 | 1.78                        | 1.01         | 3.16         | 0.0474   | *   | 1.76                       | 1.00         | 3.12         | 0.0510   |     |
| Multiracial/Other      |                 | 1.66                        | 1.18         | 2.33         | 0.0037   | *   | 1.62                       | 1.16         | 2.28         | 0.0051   | *   |
| 1 Preexisting          | 0               | 1.58                        | 1.22         | 2.05         | 0.0006   | **  | 1.59                       | 1.23         | 2.04         | 0.0003   | **  |
| 2 Preexisting          |                 | 1.23                        | 0.93         | 1.63         | 0.1503   |     | 1.26                       | 0.96         | 1.66         | 0.0970   |     |
| 3+ Preexisting         |                 | 1.63                        | 1.22         | 2.17         | 0.0009   | **  | 1.64                       | 1.24         | 2.17         | 0.0005   | **  |
| Preexisting Not Say    |                 | 0.73                        | 0.15         | 3.51         | 0.6933   |     | 0.79                       | 0.17         | 3.72         | 0.7646   |     |
| Parent                 | Not a Parent    | 1.41                        | 1.11         | 1.78         | 0.0044   | *   | 1.40                       | 1.12         | 1.76         | 0.0037   | *   |
| Income 0-40K           | 100K+           | 1.65                        | 1.03         | 2.63         | 0.0365   | *   | 1.66                       | 1.05         | 2.63         | 0.0306   | *   |
| Income 40-70K          |                 | 1.77                        | 1.34         | 2.32         | 4.70E-05 | *** | 1.75                       | 1.34         | 2.29         | 4.75E-05 | *** |
| Income 70-100K         |                 | 1.36                        | 1.05         | 1.76         | 0.0191   | *   | 1.34                       | 1.04         | 1.72         | 0.0249   | *   |
| PopDensity 0-149       | 1000+           | 1.03                        | 0.75         | 1.43         | 0.8506   |     | 1.03                       | 0.75         | 1.42         | 0.8361   |     |
| PopDensity 150-999     |                 | 1.18                        | 0.96         | 1.46         | 0.1254   |     | 1.20                       | 0.98         | 1.48         | 0.0810   |     |
| West                   | Northeast       | 0.65                        | 0.39         | 1.09         | 0.1024   |     | 0.69                       | 0.42         | 1.13         | 0.1373   |     |
| Midwest                |                 | 0.94                        | 0.59         | 1.49         | 0.7909   |     | 1.01                       | 0.64         | 1.58         | 0.9771   |     |
| South                  |                 | 1.21                        | 0.77         | 1.88         | 0.4078   |     | 1.23                       | 0.80         | 1.89         | 0.3354   |     |

|                                           |                             |      |      |      |              |      |      |      |              |
|-------------------------------------------|-----------------------------|------|------|------|--------------|------|------|------|--------------|
| <b>Answered before Pfizer EUA</b>         | <b>After Pfizer<br/>EUA</b> | 1.78 | 1.47 | 2.14 | 2.64E-09 *** | 1.78 | 1.48 | 2.14 | 1.36E-09 *** |
| <b>Practiced Protective Behavior</b>      | <b>Did Not<br/>Practice</b> | 0.92 | 0.76 | 1.12 | 0.4286       | 0.93 | 0.77 | 1.13 | 0.4940       |
| <b>State Cumulative Case Rate</b>         |                             | 1.01 | 0.91 | 1.12 | 0.8462       | 1.01 | 0.91 | 1.11 | 0.9124       |
| <b>State Cumulative Death Rate</b>        |                             | 0.83 | 0.56 | 1.23 | 0.3537       | 0.85 | 0.58 | 1.25 | 0.4028       |
| <b>Average Daily Pos Test Rate (Nov.)</b> |                             | 0.97 | 0.93 | 1.02 | 0.2570       | 0.97 | 0.93 | 1.02 | 0.2324       |
| <b>County % without HS Degree</b>         |                             | 1.02 | 1.00 | 1.04 | 0.0633       | 1.02 | 1.00 | 1.04 | 0.0630       |
| <b>Tested Positive</b>                    | <b>Tested<br/>Negative</b>  | 1.25 | 0.79 | 1.96 | 0.3443       | 1.26 | 0.80 | 1.97 | 0.3154       |

\*:  $p < 0.05$

\*\* :  $p < 0.001$

\*\*\*:  $p < 0.0001$

**Supplementary Table 11: Interim uptake analyses** - Interim analyses for the weighting procedure of the vaccine uptake analysis. Left is the weighted model to predict if a user responded to the vaccine uptake question, while right is the weighted model for predicting if a user was offered a vaccine.

| Variable                      | Reference Group  | Responded to Vaccine Uptake Question<br>(n = 23,782) |              |              |          |     | Offered Vaccine<br>(n = 18,928) |              |              |           |     |
|-------------------------------|------------------|------------------------------------------------------|--------------|--------------|----------|-----|---------------------------------|--------------|--------------|-----------|-----|
|                               |                  | OR                                                   | Lower 95% CI | Upper 95% CI | P-Value  | Sig | OR                              | Lower 95% CI | Upper 95% CI | P-Value   | Sig |
| Female                        | Male             | 0.92                                                 | 0.86         | 0.98         | 0.0142   | *   | 1.09                            | 1.00         | 1.20         | 0.0615    |     |
| Age [18,30)                   | 65+              | 0.35                                                 | 0.31         | 0.40         | 4.06E-69 | *** | 0.05                            | 0.04         | 0.06         | 5.78E-264 | *** |
| Age [30,45)                   |                  | 0.45                                                 | 0.41         | 0.50         | 2.90E-57 | *** | 0.09                            | 0.08         | 0.11         | 8.67E-215 | *** |
| Age [45,55)                   |                  | 0.65                                                 | 0.59         | 0.72         | 6.45E-17 | *** | 0.15                            | 0.13         | 0.17         | 2.06E-139 | *** |
| Age [55,65)                   |                  | 0.88                                                 | 0.81         | 0.97         | 0.0079   | *   | 0.26                            | 0.23         | 0.30         | 3.56E-80  | *** |
| Essential Healthcare          | Nonessential     | 0.84                                                 | 0.77         | 0.92         | 0.0002   | **  | 3.90                            | 3.30         | 4.60         | 1.06E-57  | *** |
| Other Essential               |                  | 0.95                                                 | 0.87         | 1.05         |          |     | 0.72                            | 0.65         | 0.80         | 3.23E-09  | *** |
| Furloughed/Job Seeker         | Employed         | 0.93                                                 | 0.83         | 1.05         | 0.2525   |     | 0.61                            | 0.53         | 0.70         | 1.96E-12  | *** |
| Unemployed                    |                  | 1.18                                                 | 1.09         | 1.28         | 6.29E-05 | *** | 0.72                            | 0.65         | 0.80         | 1.51E-10  | *** |
| African American/Black        | White            | 1.32                                                 | 1.16         | 1.50         | 1.85E-05 | *** | 0.96                            | 0.80         | 1.14         | 0.6345    |     |
| Hispanic/Latinx               |                  | 1.00                                                 | 0.89         | 1.12         | 0.9905   |     | 1.00                            | 0.85         | 1.17         | 0.9727    |     |
| Asian                         |                  | 1.04                                                 | 0.89         | 1.22         | 0.5928   |     | 0.98                            | 0.77         | 1.24         | 0.8396    |     |
| Multiracial/Other             |                  | 1.22                                                 | 1.09         | 1.37         | 0.0007   | **  | 0.80                            | 0.70         | 0.92         | 0.0016    | *   |
| 1 Preexisting                 | 0                | 0.97                                                 | 0.90         | 1.05         | 0.4792   |     | 1.03                            | 0.93         | 1.13         | 0.5779    |     |
| 2 Preexisting                 |                  | 0.93                                                 | 0.86         | 1.02         | 0.1189   |     | 1.13                            | 1.01         | 1.25         | 0.0335    | *   |
| 3+ Preexisting                |                  | 1.04                                                 | 0.95         | 1.15         | 0.3825   |     | 1.01                            | 0.90         | 1.14         | 0.8321    |     |
| Preexisting Not Say           |                  | 1.14                                                 | 0.83         | 1.56         | 0.4264   |     | 1.06                            | 0.74         | 1.51         | 0.7608    |     |
| Parent                        | Not a Parent     | 0.85                                                 | 0.79         | 0.91         | 6.41E-06 | *** | 0.89                            | 0.82         | 0.98         | 0.0120    | *   |
| Income 0-40K                  | 100K+            | 1.07                                                 | 0.91         | 1.24         | 0.4178   |     | 0.98                            | 0.80         | 1.20         | 0.8425    |     |
| Income 40-70K                 |                  | 1.06                                                 | 0.97         | 1.15         | 0.2059   |     | 0.98                            | 0.88         | 1.09         | 0.6805    |     |
| Income 70-100K                |                  | 1.10                                                 | 1.02         | 1.19         | 0.0179   | *   | 0.99                            | 0.90         | 1.09         | 0.8639    |     |
| PopDensity 0-149              | 1000+            | 0.83                                                 | 0.75         | 0.92         | 0.0002   | **  | 0.91                            | 0.80         | 1.04         | 0.1681    |     |
| PopDensity 150-999            |                  | 0.85                                                 | 0.80         | 0.91         | 4.20E-06 | *** | 1.02                            | 0.93         | 1.11         | 0.6911    |     |
| West                          | Northeast        | 1.11                                                 | 0.95         | 1.30         | 0.1842   |     | 0.96                            | 0.79         | 1.17         | 0.6803    |     |
| Midwest                       |                  | 1.05                                                 | 0.92         | 1.21         | 0.470    |     | 0.91                            | 0.77         | 1.09         | 0.3125    |     |
| South                         |                  | 1.02                                                 | 0.89         | 1.17         | 0.7614   |     | 0.87                            | 0.73         | 1.04         | 0.1201    |     |
| Practiced Protective Behavior | Did Not Practice | 0.62                                                 | 0.58         | 0.66         | 1.35E-51 | *** | 0.66                            | 0.61         | 0.72         | 3.38E-24  | *** |

|                                           |                                |      |      |      |          |      |      |      |              |
|-------------------------------------------|--------------------------------|------|------|------|----------|------|------|------|--------------|
| <b>State Cumulative Case Rate</b>         |                                | 0.98 | 0.95 | 1.01 | 0.2732   | 1.01 | 0.97 | 1.05 | 0.720        |
| <b>State Cumulative Death Rate</b>        |                                | 1.09 | 0.96 | 1.23 | 0.1729   | 1.03 | 0.88 | 1.21 | 0.7137       |
| <b>Average Daily Pos Test Rate (Nov.)</b> |                                | 1.01 | 0.99 | 1.02 | 0.2767   | 1.00 | 0.98 | 1.01 | 0.6282       |
| <b>County % without HS Degree</b>         |                                | 0.99 | 0.99 | 1.00 | 0.1606   | 1.01 | 1.00 | 1.02 | 0.1056       |
| <b>Received COVID Test</b>                | <b>Never Received Test</b>     | 0.94 | 0.86 | 1.02 | 0.1488   | 1.23 | 1.09 | 1.38 | 0.0005 **    |
| <b>Vaccine Intent - Unlikely</b>          | <b>Vaccine Intent - Likely</b> | 0.84 | 0.75 | 0.94 | 0.0029 * | 0.51 | 0.44 | 0.59 | 2.53E-19 *** |
| <b>Vaccine Intent - Undecided</b>         | <b>Vaccine Intent - Likely</b> | 0.91 | 0.83 | 0.99 | 0.0363 * | 0.57 | 0.51 | 0.64 | 1.33E-22 *** |

\*: p < 0.05

\*\*: p < 0.001

\*\*\*: p < 0.0001

**Supplementary Table 12: Vaccination Uptake Analyses** - Unweighted model for predicting vaccine uptake (left) and a weighed model for predicting vaccine uptake accounting for non-response bias and biases associated with being offered a vaccine.

| Variable                      | Reference Group  | Unweighted Uptake Analysis<br>(n = 18,928) |                 |                 |              |     | Weighted Uptake Analysis<br>(n = 18,928) |                 |                 |              |     |
|-------------------------------|------------------|--------------------------------------------|-----------------|-----------------|--------------|-----|------------------------------------------|-----------------|-----------------|--------------|-----|
|                               |                  | OR                                         | Lower<br>95% CI | Upper<br>95% CI | P-Value      | Sig | OR                                       | Lower<br>95% CI | Upper<br>95% CI | P-Value      | Sig |
| Female                        | Male             | 0.74                                       | 0.52            | 1.03            | 0.0808       |     | 0.90                                     | 0.60            | 1.33            | 0.5868       |     |
| Age [18,30)                   | 65+              | 0.13                                       | 0.08            | 0.20            | 2.41E-18 *** |     | 0.10                                     | 0.06            | 0.18            | 1.43E-16 *** |     |
| Age [30,45)                   |                  | 0.23                                       | 0.16            | 0.34            | 7.06E-14 *** |     | 0.20                                     | 0.13            | 0.31            | 1.29E-13 *** |     |
| Age [45,55)                   |                  | 0.40                                       | 0.27            | 0.59            | 3.94E-06 *** |     | 0.38                                     | 0.25            | 0.57            | 3.68E-06 *** |     |
| Age [55,65)                   |                  | 0.57                                       | 0.39            | 0.82            | 0.0025 *     |     | 0.55                                     | 0.37            | 0.81            | 0.0029 *     |     |
| Essential Healthcare          | Nonessential     | 0.69                                       | 0.53            | 0.92            | 0.0107 *     |     | 0.74                                     | 0.54            | 1.01            | 0.0540       |     |
| Other Essential               |                  | 0.65                                       | 0.48            | 0.90            | 0.0077 *     |     | 0.64                                     | 0.44            | 0.92            | 0.0162 *     |     |
| Furloughed/Job Seeker         | Employed         | 0.92                                       | 0.61            | 1.41            | 0.6821       |     | 0.96                                     | 0.60            | 1.56            | 0.8841       |     |
| Unemployed                    |                  | 1.00                                       | 0.74            | 1.36            | 0.9874       |     | 0.86                                     | 0.61            | 1.22            | 0.3991       |     |
| African American/Black        | White            | 0.74                                       | 0.52            | 1.08            | 0.1129       |     | 0.58                                     | 0.38            | 0.91            | 0.0165 *     |     |
| Hispanic/Latinx               |                  | 0.80                                       | 0.54            | 1.21            | 0.2790       |     | 1.07                                     | 0.62            | 1.84            | 0.8080       |     |
| Asian                         |                  | 2.23                                       | 0.86            | 7.69            | 0.1432       |     | 2.45                                     | 0.78            | 7.73            | 0.1266       |     |
| Multiracial/Other             |                  | 0.79                                       | 0.53            | 1.20            | 0.2465       |     | 0.72                                     | 0.43            | 1.21            | 0.2164       |     |
| 1 Preexisting                 | 0                | 0.85                                       | 0.63            | 1.14            | 0.2869       |     | 0.99                                     | 0.69            | 1.43            | 0.9620       |     |
| 2 Preexisting                 |                  | 0.88                                       | 0.64            | 1.21            | 0.4216       |     | 1.00                                     | 0.69            | 1.46            | 0.9995       |     |
| 3+ Preexisting                |                  | 0.87                                       | 0.62            | 1.22            | 0.4198       |     | 1.05                                     | 0.70            | 1.60            | 0.8072       |     |
| Preexisting Not Say           |                  | 0.41                                       | 0.17            | 1.11            | 0.0561       |     | 0.95                                     | 0.22            | 4.14            | 0.9412       |     |
| Parent                        | Not a Parent     | 0.78                                       | 0.60            | 1.01            | 0.0584       |     | 0.63                                     | 0.45            | 0.89            | 0.0086 *     |     |
| Income 0-40K                  | 100K+            | 0.81                                       | 0.46            | 1.44            | 0.4642       |     | 0.79                                     | 0.39            | 1.62            | 0.5221       |     |
| Income 40-70K                 |                  | 0.53                                       | 0.37            | 0.76            | 0.0007 **    |     | 0.56                                     | 0.37            | 0.85            | 0.0066 *     |     |
| Income 70-100K                |                  | 0.64                                       | 0.44            | 0.91            | 0.0139 *     |     | 0.63                                     | 0.42            | 0.96            | 0.0316 *     |     |
| PopDensity 0-149              | 1000+            | 0.48                                       | 0.35            | 0.67            | 1.82E-05 *** |     | 0.53                                     | 0.34            | 0.82            | 0.0049 *     |     |
| PopDensity 150-999            |                  | 0.79                                       | 0.61            | 1.01            | 0.0581       |     | 0.81                                     | 0.59            | 1.11            | 0.1841       |     |
| West                          | Northeast        | 0.87                                       | 0.50            | 1.49            | 0.6039       |     | 0.95                                     | 0.50            | 1.79            | 0.8640       |     |
| Midwest                       |                  | 0.75                                       | 0.46            | 1.22            | 0.2380       |     | 0.73                                     | 0.43            | 1.23            | 0.2372       |     |
| South                         |                  | 0.62                                       | 0.38            | 1.01            | 0.0563       |     | 0.69                                     | 0.40            | 1.17            | 0.1669       |     |
| Practiced Protective Behavior | Did Not Practice | 1.17                                       | 0.91            | 1.53            | 0.2209       |     | 1.06                                     | 0.79            | 1.41            | 0.7170       |     |
| State Cumulative Case Rate    |                  | 0.95                                       | 0.85            | 1.06            | 0.3754       |     | 0.99                                     | 0.86            | 1.13            | 0.8526       |     |
| State Cumulative Death Rate   |                  | 0.83                                       | 0.54            | 1.28            | 0.4071       |     | 0.90                                     | 0.55            | 1.46            | 0.6601       |     |

|                                           |                                |      |      |      |               |  |      |      |      |               |
|-------------------------------------------|--------------------------------|------|------|------|---------------|--|------|------|------|---------------|
| <b>Average Daily Pos Test Rate (Nov.)</b> |                                | 0.98 | 0.94 | 1.02 | 0.3269        |  | 0.97 | 0.92 | 1.02 | 0.1763        |
| <b>County % without HS Degree</b>         |                                | 1.00 | 0.97 | 1.02 | 0.8621        |  | 0.99 | 0.96 | 1.02 | 0.6456        |
| <b>Received COVID Test</b>                | <b>Never Received Test</b>     | 1.00 | 0.73 | 1.39 | 0.9845        |  | 1.05 | 0.75 | 1.49 | 0.7635        |
| <b>Vaccine Intent - Unlikely</b>          | <b>Vaccine Intent - Likely</b> | 0.02 | 0.01 | 0.02 | 2.25E-183 *** |  | 0.02 | 0.01 | 0.03 | 2.07E-114 *** |
| <b>Vaccine Intent - Undecided</b>         | <b>Vaccine Intent - Likely</b> | 0.08 | 0.06 | 0.11 | 1.22E-67 ***  |  | 0.08 | 0.06 | 0.12 | 1.06E-39 ***  |

\*: p < 0.05

\*\*: p < 0.001

\*\*\*: p < 0.0001

**Supplementary Table 13: Hesitant User Analysis** - Weighted vaccine uptake model for only users that responded as "hesitant" to the vaccine intent question.

**Vaccine Uptake Analysis for Hesitant Users**  
(n = 2,520)

| Variable                           | Reference Group           | OR   | Lower 95% CI | Upper 95% CI | P-Value  | Sig |
|------------------------------------|---------------------------|------|--------------|--------------|----------|-----|
| Female                             | Male                      | 0.68 | 0.44         | 1.06         | 0.0894   |     |
| Age [18,30)                        | 65+                       | 0.14 | 0.07         | 0.25         | 5.48E-10 | *** |
| Age [30,45)                        |                           | 0.27 | 0.16         | 0.45         | 4.79E-07 | *** |
| Age [45,55)                        |                           | 0.40 | 0.24         | 0.66         | 0.0003   | **  |
| Age [55,65)                        |                           | 0.60 | 0.37         | 0.99         | 0.0460   | *   |
| Essential Healthcare               | Nonessential              | 0.66 | 0.47         | 0.94         | 0.0222   | *   |
| Other Essential                    |                           | 0.65 | 0.44         | 0.97         | 0.0336   | *   |
| Furloughed/Job Seeker              | Employed                  | 1.18 | 0.69         | 2.01         | 0.5501   |     |
| Unemployed                         |                           | 1.11 | 0.74         | 1.66         | 0.6231   |     |
| African American/Black             | White                     | 0.76 | 0.50         | 1.15         | 0.1908   |     |
| Hispanic/Latinx                    |                           | 0.98 | 0.57         | 1.68         | 0.9379   |     |
| Asian                              |                           | 3.18 | 0.70         | 14.42        | 0.1337   |     |
| Multiracial/Other                  |                           | 0.80 | 0.46         | 1.38         | 0.4241   |     |
| 1 Preexisting                      | 0                         | 0.97 | 0.67         | 1.39         | 0.8504   |     |
| 2 Preexisting                      |                           | 0.87 | 0.59         | 1.29         | 0.4989   |     |
| 3+ Preexisting                     |                           | 0.94 | 0.61         | 1.44         | 0.7672   |     |
| Preexisting Not Say                |                           | 2.34 | 0.61         | 8.98         | 0.2158   |     |
| Parent                             | Not a Parent              | 0.79 | 0.57         | 1.10         | 0.1565   |     |
| Income 0-40K                       | 100K+                     | 1.15 | 0.55         | 2.38         | 0.7143   |     |
| Income 40-70K                      |                           | 0.60 | 0.39         | 0.90         | 0.0149   | *   |
| Income 70-100K                     |                           | 0.80 | 0.52         | 1.23         | 0.3099   |     |
| PopDensity 0-149                   | 1000+                     | 0.48 | 0.31         | 0.75         | 0.0012   | *   |
| PopDensity 150-999                 |                           | 0.79 | 0.58         | 1.08         | 0.1428   |     |
| West                               | Northeast                 | 0.76 | 0.39         | 1.51         | 0.4392   |     |
| Midwest                            |                           | 0.75 | 0.41         | 1.37         | 0.3510   |     |
| South                              |                           | 0.66 | 0.36         | 1.20         | 0.1764   |     |
| Practiced Protective Behavior      | Did Not Practice          | 0.91 | 0.67         | 1.25         | 0.5592   |     |
| State Cumulative Case Rate         |                           | 0.93 | 0.80         | 1.08         | 0.3527   |     |
| State Cumulative Death Rate        |                           | 0.79 | 0.46         | 1.36         | 0.3954   |     |
| Average Daily Pos Test Rate (Nov.) |                           | 0.99 | 0.93         | 1.04         | 0.6154   |     |
| County % without HS Degree         |                           | 0.99 | 0.96         | 1.03         | 0.6810   |     |
| Received COVID Test                | Never Received Test       | 0.90 | 0.60         | 1.35         | 0.6181   |     |
| Vaccine Intent - Undecided         | Vaccine Intent - Unlikely | 4.57 | 3.47         | 6.03         | 2.26E-26 | *** |



\*:  $p < 0.05$

\*\* :  $p < 0.001$

\*\*\*:  $p < 0.0001$
